# Supplementary material for: Selective, high-temperature permeation of nitrogen oxides using a supported molten salt membrane
Source: Royal Society of Chemistry journal article supplement (doi:10.1039/c4ee02256d), 2015-01-01
Supplement: c4ee02256d1.pdf [file c4ee02256d1.pdf]

## Supplementary Information

### **Selective, high-temperature permeation of nitrogen oxides using a supported molten salt membrane**

G. Zhang, E. I. Papaioannou and I. S. Metcalfe\*

*School of Chemical Engineering and Advanced Materials, Newcastle University, Newcastle upon Tyne NE1 7RU, UK*

*\*corresponding author: E-mail: [i.metcalfe@newcastle.ac.uk](mailto:i.metcalfe@newcastle.ac.uk); Tel: +44 (0) 191 222 5279*

Content:

1. Support membrane preparation
2. Dual-phase membrane preparation
3. Microstructure of the dual phase membranes
4. Experimental set-up and procedure
5. Equilibrium constant
6. Calculation of permeance
7. Experiments with different nitrogen dioxide mole fractions in the feed side inlet
8. Experiments with different oxygen mole fractions in the feed side inlet  
Water exposure
9. Sulphur dioxide exposure
10. Separation factor
11. Measurement uncertainty

### ***1. Support membrane preparation***

LSCF powder (provided by PRAXAIR,  $D_{50}=0.8\ \mu\text{m}$ ) or  $\alpha\text{-Al}_2\text{O}_3$  powder (99.95%, Alfa Aesar) was used to prepare porous support membranes. The powder was mixed with approximately 30 wt.% corn starch (Sigma-Aldrich) and then uniaxially pressed at 3 tonnes (ATLAS T25). The green membranes ( $3.14\ \text{cm}^2$ ) were sintered at  $1200^\circ\text{C}$  for 5 hours in stagnant air with a heating and cooling rate of  $2^\circ\text{C}\ \text{min}^{-1}$ . The porosity of the LSCF and  $\text{Al}_2\text{O}_3$  pellets were 32 % and 54% (Archimedes method), respectively. The sintered porous membranes were polished to a thickness of 1.0 mm for LSCF and 0.75 mm for  $\text{Al}_2\text{O}_3$ .

### ***2. Dual-phase membrane preparation***

The porous LSCF and  $\text{Al}_2\text{O}_3$  membranes were infiltrated with potassium nitrate (99.95%, Alfa Aesar) to obtain dual-phase membranes. Membranes with nitrate powder (99.95%, Alfa Aesar) placed on top were heated in a furnace to  $350^\circ\text{C}$  and held for 1 hour. Potassium nitrate melts above  $334^\circ\text{C}$  and subsequently soaks into the membrane via capillary action. The infiltration process was repeated until residual nitrate was seen to be present on the upper surface of the membrane.  $\text{KNO}_3/\text{LSCF}$  and  $\text{KNO}_3/\text{Al}_2\text{O}_3$  were prepared for permeation experiments.

### ***3. Microstructure of the dual phase membranes***

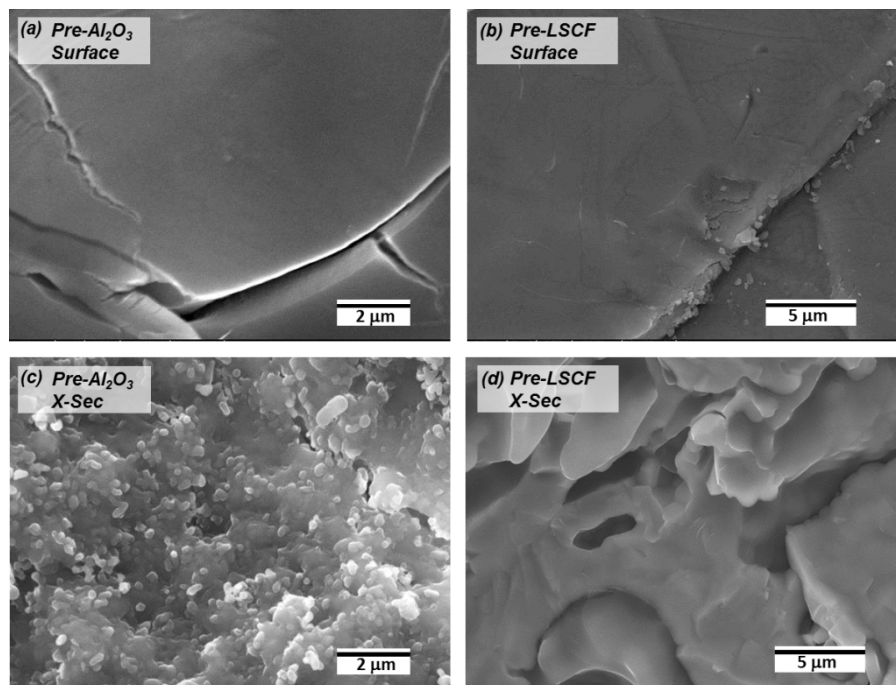

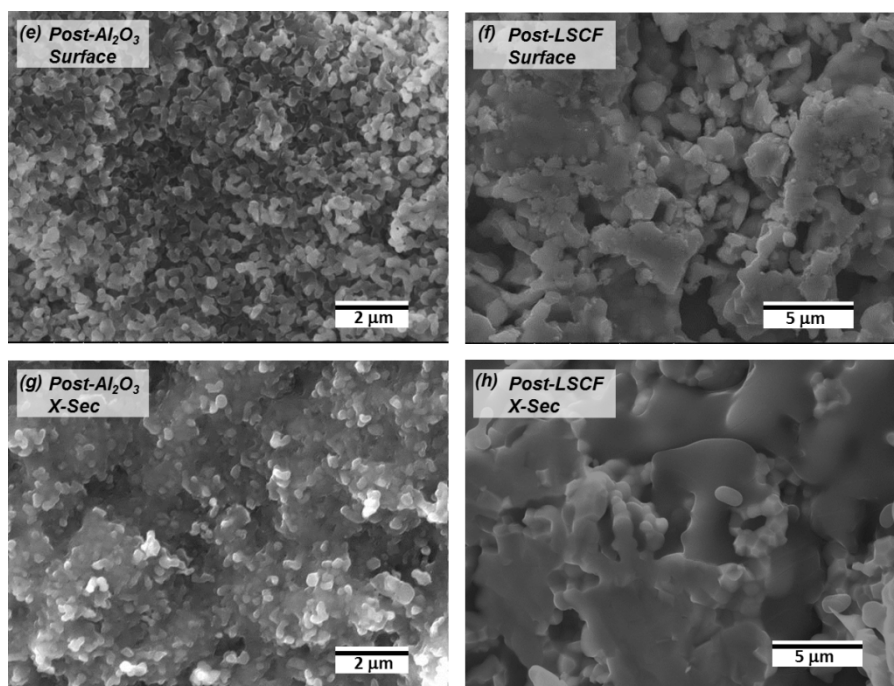

**Fig. S1** SEM images of KNO<sub>3</sub>/Al<sub>2</sub>O<sub>3</sub> and KNO<sub>3</sub>/LSCF membranes before (pre-) and after (post-) experiment

Before the experiments, a top layer of solid nitrate on the fresh KNO<sub>3</sub>/Al<sub>2</sub>O<sub>3</sub> and KNO<sub>3</sub>/LSCF membranes (**Fig. S1a and b**) was visible (excess nitrate was observed during the infiltration as a molten layer covering the membrane). Cracks can be observed in the nitrate overlayer possible as a result of the solidification of the molten salt. Such cracks were not visible in the bulk cross-sections of the fresh KNO<sub>3</sub>/Al<sub>2</sub>O<sub>3</sub> and KNO<sub>3</sub>/LSCF membranes (**Fig. S1c and d**). The top solid nitrate overlayer disappeared after experiment (**Fig. S1e and f**) possibly due to further infiltration. As can be seen, there are defects and voids apparent in the fresh KNO<sub>3</sub>/Al<sub>2</sub>O<sub>3</sub> and KNO<sub>3</sub>/LSCF membranes (**Fig. S1c and d**). After the experiments these features seem to have disappeared (**Fig. S1g and h**). This class of dual-phase membrane may have benefited from a self-healing functionality because of the presence of a wetting molten salt. Complete infiltration of the post-experiment KNO<sub>3</sub>/Al<sub>2</sub>O<sub>3</sub> and KNO<sub>3</sub>/LSCF membranes was confirmed by observing SEM images at five or more locations in the membrane cross-section.

#### **4. Experimental setup and procedure**

A Schematic diagram of the experimental setup is shown in **Fig. S2**. The pellet membranes were mounted on the top of an alumina tube using a high temperature commercial gold sealant (FuelCellMaterials, AU-I). Cylinders of (C1) 1% NO<sub>2</sub>, 1% CO<sub>2</sub> and 1% N<sub>2</sub>; (C2) 1% NO<sub>2</sub>, 1% CO<sub>2</sub> and 20% O<sub>2</sub>; (C3) argon; (C4) 1% CO<sub>2</sub>, 1% N<sub>2</sub>, 20% O<sub>2</sub>; (C5) 5% NO<sub>2</sub>, 1%CO<sub>2</sub>, 20% O<sub>2</sub>; (C6) 200 ppm SO<sub>2</sub> were used. In all cases the balance gas used was argon. Compositions in the feed side inlet were obtained by mixing these gases through mass flow controllers (Brooks, SLA5850). The flows on both the feed and permeate sides were maintained at 30 cm<sup>3</sup> (STP)

$\text{min}^{-1}$ .  $\text{N}_2$  served as a trace gas for periodic leak detection. The permeate side outlet was connected to a  $\text{NO}_x$  analyser (X-stream, X2GP) and a mass spectrometer (GeneSys) ( $\text{CO}_2/\text{N}_2/\text{O}_2$  analysis) in series.

Cylinders C1, C2, C4 and C5 were from StG with a relative accuracy of mole fractions of  $\pm 2\%$ ; Cylinders C3 and C6 were from BOC; C6 had a relative accuracy of mole fractions better than  $\pm 5\%$ .

The feed side of the membrane was exposed to 200 ppm  $\text{SO}_2$  for 2, 4 and 8 hours. After each exposure (2, 4 or 8 hours), the feed side inlet was switched to argon for two hours followed by a  $\text{NO}_2$ -containing stream (1%  $\text{NO}_2$ , 1%  $\text{CO}_2$  and 20%  $\text{O}_2$ ). A similar procedure was also applied for  $\text{H}_2\text{O}$  introduction, where the feed side of the membrane was exposed to around 2.8 %  $\text{H}_2\text{O}$ .

The reactor was placed in a temperature programmable furnace (Vecstar, 2416CG-1100) and held at  $100^\circ\text{C}$  prior to heating to  $450^\circ\text{C}$  to perform permeation experiments (heating rate was  $2^\circ\text{C min}^{-1}$ ). Experiments were performed by changing the feed gas inlet composition and monitoring the response of the permeate side outlet composition.

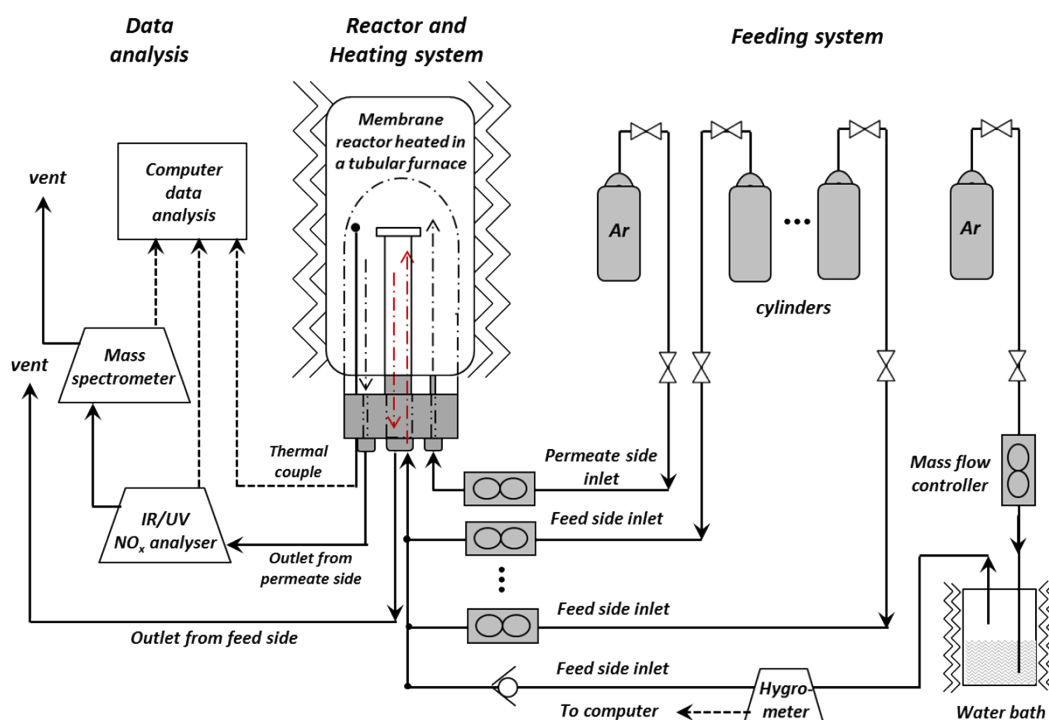

Fig. S2 Schematic diagram of experiment set-up

### 5. Equilibrium constant

We must also recall that at temperatures of  $450^\circ\text{C}$  there is a dynamic equilibrium between  $\text{NO}_2$ ,  $\text{NO}$  and  $\text{O}_2$  (Reaction *SR.1*),

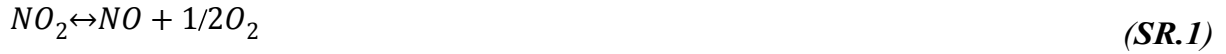

$$K_{450^\circ C} = \frac{[NO][O_2]^{1/2}}{[NO_2]} = 2.55 \times 10^{-3} \text{ atm}^{1/2} \quad (SE.1)$$

This means that NO<sub>2</sub> and NO in the gas phase are interchangeable, that is, NO<sub>2</sub> may permeate across the membrane but may be observed as NO and O<sub>2</sub> on the permeate side. If on the permeate side we use typical an O<sub>2</sub> mole fraction of 100 ppm and a NO<sub>2</sub> mole fraction of 100 ppm then the equilibrium NO mole fraction will be 26 ppm. This indicates that NO present on the permeate side could be the result of NO<sub>2</sub> decomposition. On the feed side the presence of a significant oxygen mole fraction means that NO<sub>2</sub> decomposition is not a problem and there is little NO present.

## 6. Calculation of permeance

Here we evaluate the total permeance for NO<sub>x</sub> and not individual permeances for NO<sub>2</sub> and NO. The reason for this is the reversible reaction, Reaction **SR.1** as well as the possibility that the LSCF itself may be undergoing a slow oxidation (or reduction) over time that could favour NO appearance on the permeate side over NO<sub>2</sub>.

$$\text{Permeance} = (x_{NO_2,perm} + x_{NO,perm}) \times F_{outlet,perm}/V/S/\Delta P \quad (SE.2)$$

$$\Delta P = (x_{NO_2,feed} - x_{NO_x,perm}) \times P \approx x_{NO_2,feed} \times P \quad (SE.3)$$

Where,  $F_{outlet,perm}$  is the outlet flow rate in the permeate side, approximately 30 cm<sup>3</sup> (STP) min<sup>-1</sup> or 0.5 cm<sup>3</sup> (STP) s<sup>-1</sup>;  $V$  is the molar volume of an ideal gas at STP;  $S$  is the membrane working area (0.5 cm<sup>2</sup> for both KNO<sub>3</sub>/LSCF and KNO<sub>3</sub>/Al<sub>2</sub>O<sub>3</sub> membranes in **Fig. S3** and 0.32 cm<sup>2</sup> for KNO<sub>3</sub>/LSCF and 0.40 cm<sup>2</sup> for KNO<sub>3</sub>/Al<sub>2</sub>O<sub>3</sub> in **Fig. S4**);  $x_{NO_2,feed}$  is the inlet NO<sub>2</sub> mole fraction to the feed side and  $x_{NO_x,perm}$ ,  $x_{NO_2,perm}$  and  $x_{NO,perm}$  are the outlet NO<sub>x</sub> (NO and NO<sub>2</sub>), NO<sub>2</sub> and NO mole fractions in the permeate side outlet respectively.

## 7. Experiments with different nitrogen dioxide mole fractions in the feed side inlet

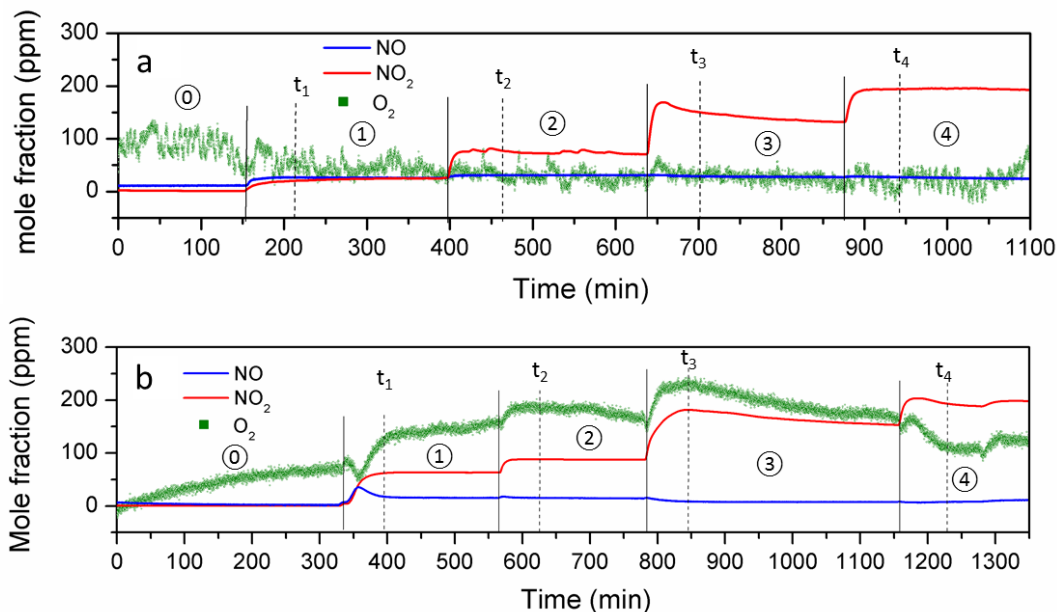

**Fig. S3** Mole fraction of  $\text{NO}_2$ ,  $\text{NO}$  and  $\text{O}_2$  in the permeate side outlet for (a)  $\text{KNO}_3/\text{Al}_2\text{O}_3$  membrane and (b)  $\text{KNO}_3/\text{LSCF}$  membrane. Step 0 to 4 with different mole fractions of  $\text{NO}_2$  at 0%, 0.5%, 1%, 3% and 5% in the feed side inlet, where the mole fraction of  $\text{O}_2$  and  $\text{CO}_2$  were kept constant at 20% and 1%, respectively. Argon used as the sweep gas and the flow rate in both sides was  $30 \text{ ml (STP) min}^{-1}$ .

### 8. Experiments with different oxygen mole fractions in the feed side inlet

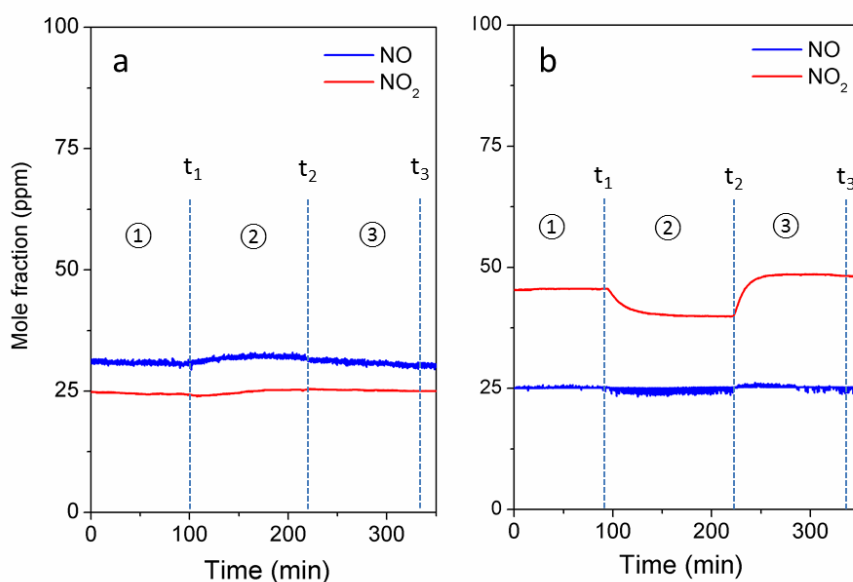

**Fig. S4** Mole fraction of  $\text{NO}_2$  and  $\text{NO}$  in the permeate side outlet for (a)  $\text{KNO}_3/\text{Al}_2\text{O}_3$  membrane and (b)  $\text{KNO}_3/\text{LSCF}$  membrane. Stage 1 to 3 with different mole fractions of  $\text{O}_2$  of 10%, 0% and 20% in the feed side inlet, where the mole fractions of  $\text{NO}_2$  and  $\text{CO}_2$  were kept constant at 1%, respectively. Argon used as the sweep gas and the flow rate in both sides was  $30 \text{ ml (STP) min}^{-1}$ .

### 9. Water exposure

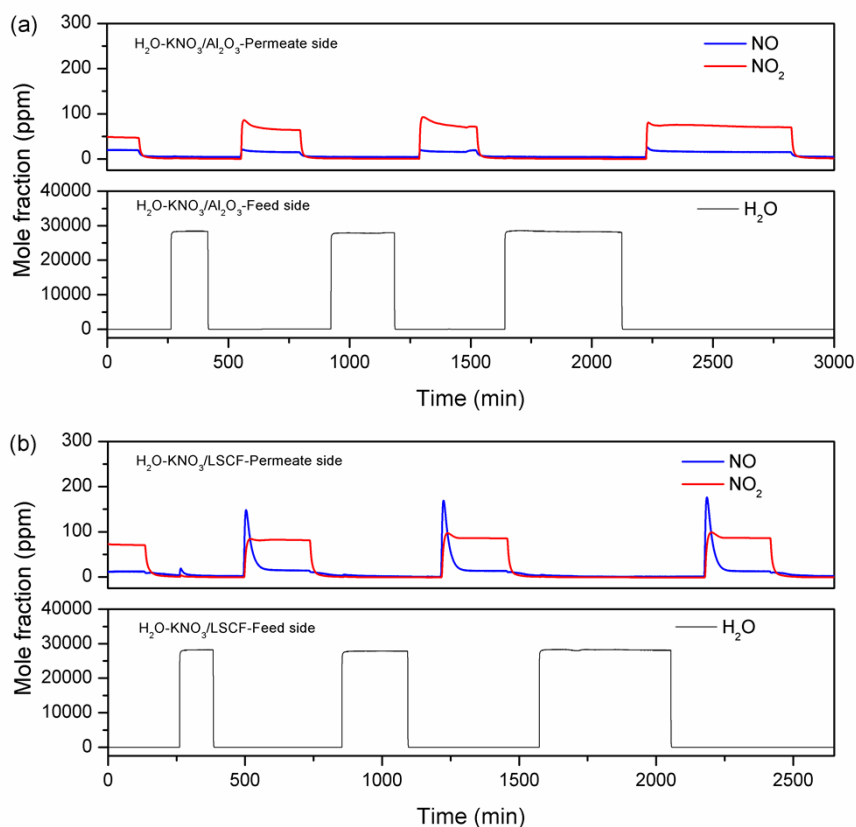

**Fig. S5** Effect of H<sub>2</sub>O exposure to the permeate side on NO<sub>x</sub> permeation of (a) KNO<sub>3</sub>/Al<sub>2</sub>O<sub>3</sub> and (b) KNO<sub>3</sub>/LSCF membranes. The feed side of each membrane was exposed to H<sub>2</sub>O (2.8% in argon) for 2, 4 and 8 hours, subsequently, after each step (2, 4 or 8 hours), the feed side inlet was switched back to the NO<sub>2</sub>-containing stream (1% NO<sub>2</sub>, 1% CO<sub>2</sub> and 20% O<sub>2</sub>). Between the H<sub>2</sub>O and NO<sub>2</sub> stream switching, there was a 2 hours purge with Ar.

### 10. Sulphur dioxide exposure

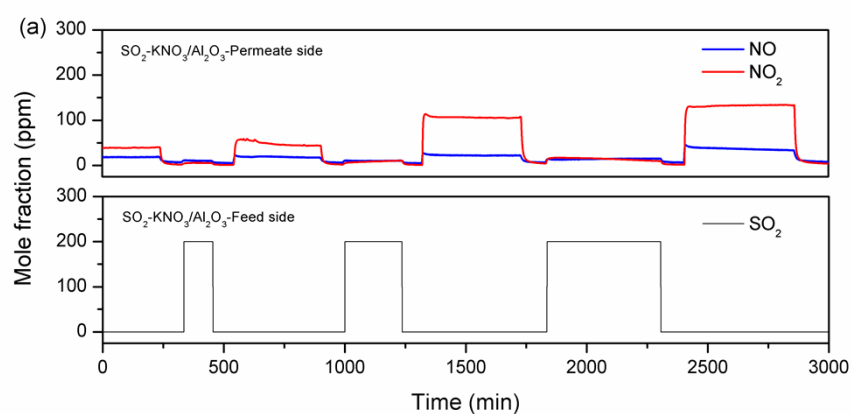



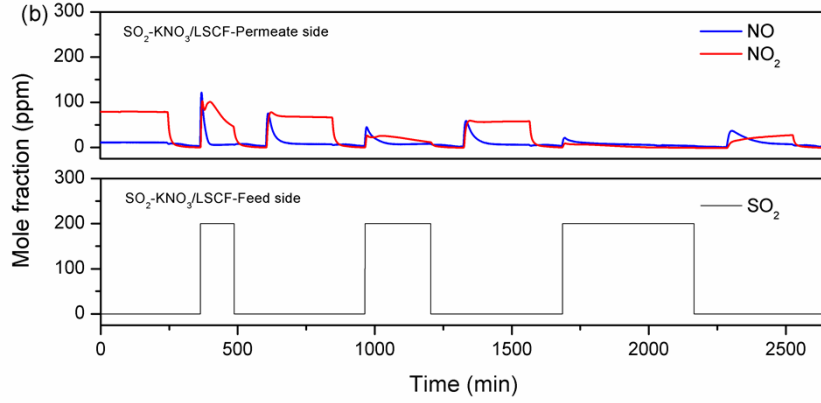

**Fig. S6** Effect of SO<sub>2</sub> exposure to the permeate side on NO<sub>x</sub> permeation of (a) KNO<sub>3</sub>/Al<sub>2</sub>O<sub>3</sub> and (b) KNO<sub>3</sub>/LSCF membranes. The feed side of each membrane was exposed on SO<sub>2</sub> (200 ppm in argon) for 2, 4 and 8 hours, subsequently, after each step (2, 4 or 8 hours), the feed side inlet was switched back to the NO<sub>2</sub>-containing stream (1% NO<sub>2</sub>, 1% CO<sub>2</sub> and 20% O<sub>2</sub>). Between the SO<sub>2</sub> and NO<sub>2</sub> stream switching, there was a 2 hours purge with Ar.

## 11. Separation factor

The separation factor ( $\alpha$ ) for a binary mixture is defined as

$$\alpha_{ij} = \frac{\left( \frac{x_{i,perm}}{x_{j,perm}} \right)}{\left( \frac{x_{i,feed}}{x_{j,feed}} \right)} \quad (SE.4)$$

Where  $x_{i,perm}$  and  $x_{i,feed}$  are the mole fraction of component  $i$  in the permeate side outlet and feed side inlet; the subscripts  $i, j$  refer to the component in the mixture.

## 12. Measurement uncertainty

### 12.1 NO<sub>x</sub> analyser

The non-dispersive infrared and ultraviolet NO<sub>x</sub> analyser detects NO (full scale (FS): 0-3000 ppm) and NO<sub>2</sub> (FS: 0-500 ppm), respectively. The NO baseline drift was smaller than 9 ppm over a 3000-minute experiment with an NO<sub>2</sub> drift that was much smaller than this. The mass spectrometer was not suitable for NO and NO<sub>2</sub> analysis because of the dynamic equilibrium between these species which would be of concern particularly at lower pressures.

### 12.2 Mass spectrometer

The drift of the mass to charge ratio of 32 signal is significant and averages up to 100-120 ppm over 12 hours. Oxygen permeation rates were thus estimated from dynamic changes in the 32 signal in response to changes in the feed side inlet composition using data taken at the time of the change in composition and a time one hour later. Consequently the drift in the signal is

expected to be on average less than 10 ppm. Therefore, for oxygen-related calculations, such as separation factor, an uncertainty can be estimated on this basis and has been presented in oxygen-related data.
